# Supplementary material for: Association Between Spatial Heterogeneity Within Nonmetastatic Gastroesophageal Adenocarcinomas and Survival
Source: PubMed Central journal article supplement (PMC7186861; doi:10.1001/jamanetworkopen.2020.3652), 2020-04-27
Supplement: jamanetwopen-3-e203652-s001.pdf [file jamanetwopen-3-e203652-s001.pdf]

## Supplementary Online Content

Chao J, Bedell V, Lee J, et al. Association between spatial heterogeneity within nonmetastatic gastroesophageal adenocarcinomas and survival. *JAMA Netw Open*. 2020;3(4):e203652. doi:10.1001/jamanetworkopen.2020.3652

**eFigure 1.** Distribution of Percentage of Genomic Changes

**eFigure 2.** A Case With Significant Alterations in Whole-Genome Copy Number and B-Allele Frequency Plot

**eFigure 3.** Oncoprint of CNAs and Mutations Detected With the OncoScan Platform Demonstrating Interpatient Tumoral Heterogeneity of Genomic Alterations of Selected Genes of Interest

**eFigure 4.** OncoScan Genomic Data

**eFigure 5.** Patient 29 Representing a pT3N0 Lauren Diffuse Subtype Adenocarcinoma Arising From the GEJ With CNAs in *MET*, *FGFR2*, *CCND1*, *EGFR*, *CD274*, and *PDCD1LG2*

**eFigure 6.** Patient 37 Representing a pT2N3a Lauren Intestinal Subtype Adenocarcinoma Arising From the Gastric Cardia

**eFigure 7.** Patient 21 Representing a pT3N0 Lauren Intestinal Subtype Adenocarcinoma Arising From the Gastric Antrum

This supplementary material has been provided by the authors to give readers additional information about their work.

**eFigure 1.** Distribution of Percentage of Genomic Changes

**A.** Box plots representing distribution of percentage genomic changes between Lauren intestinal vs. diffuse subtype histology. Lines represent the median and 25<sup>th</sup> and 75th percentiles.

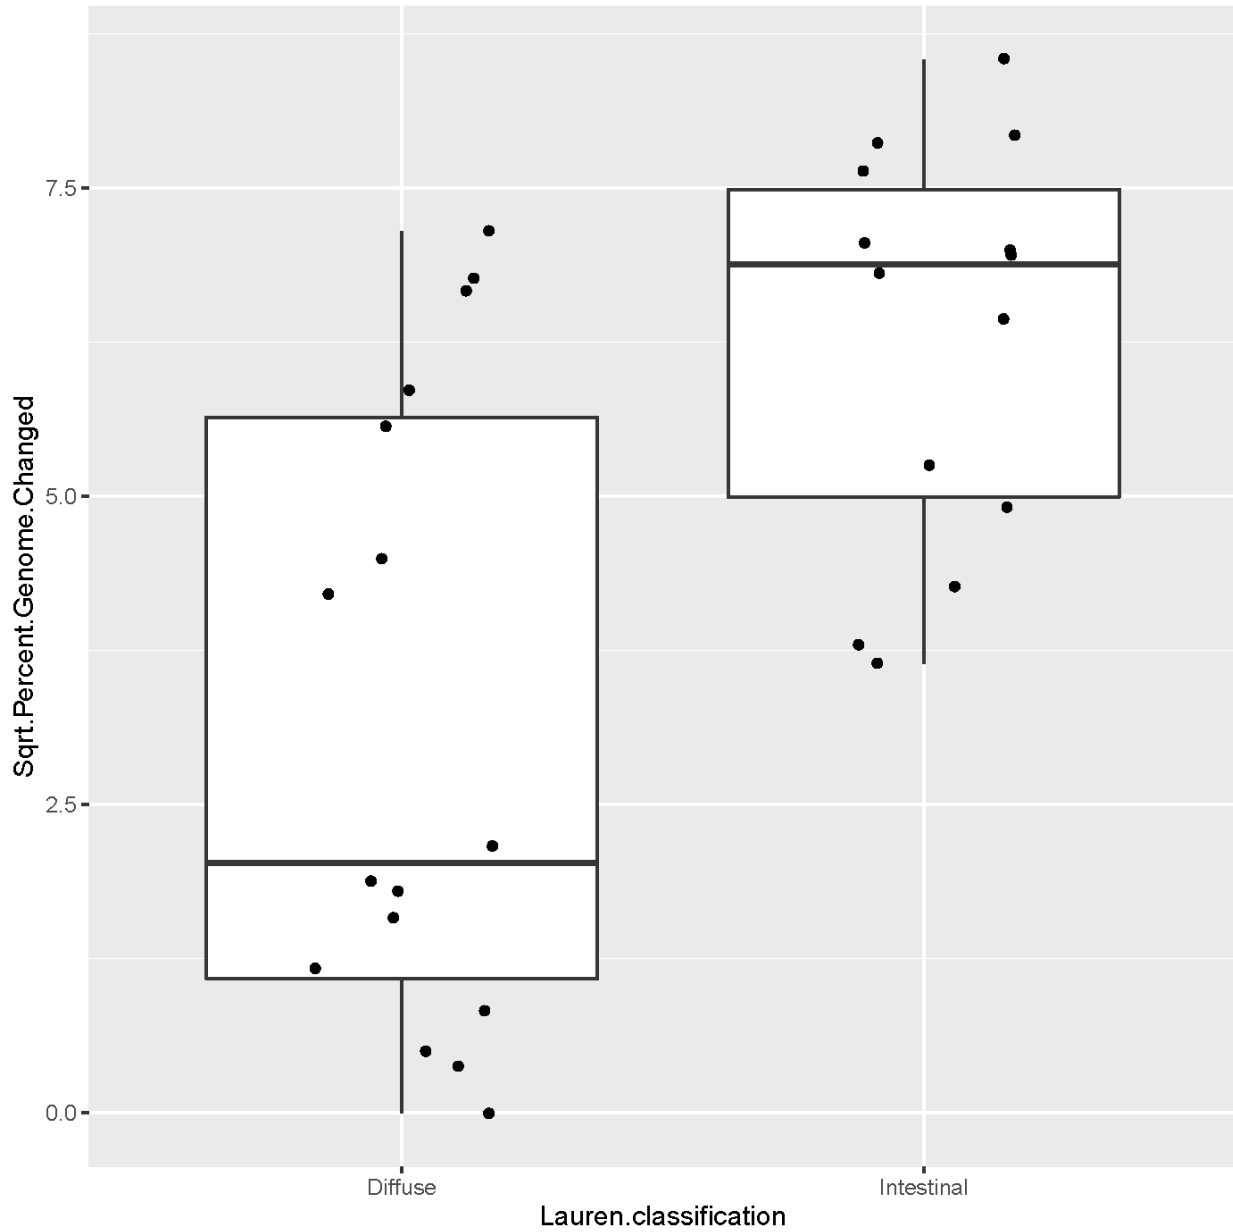

**B.** Box plots representing distribution of percentage genomic changes between tumors arising from the GEJ/cardia/proximal stomach vs. Gastric body/antrum. Lines represent the median and 25<sup>th</sup> and 75<sup>th</sup> percentiles.

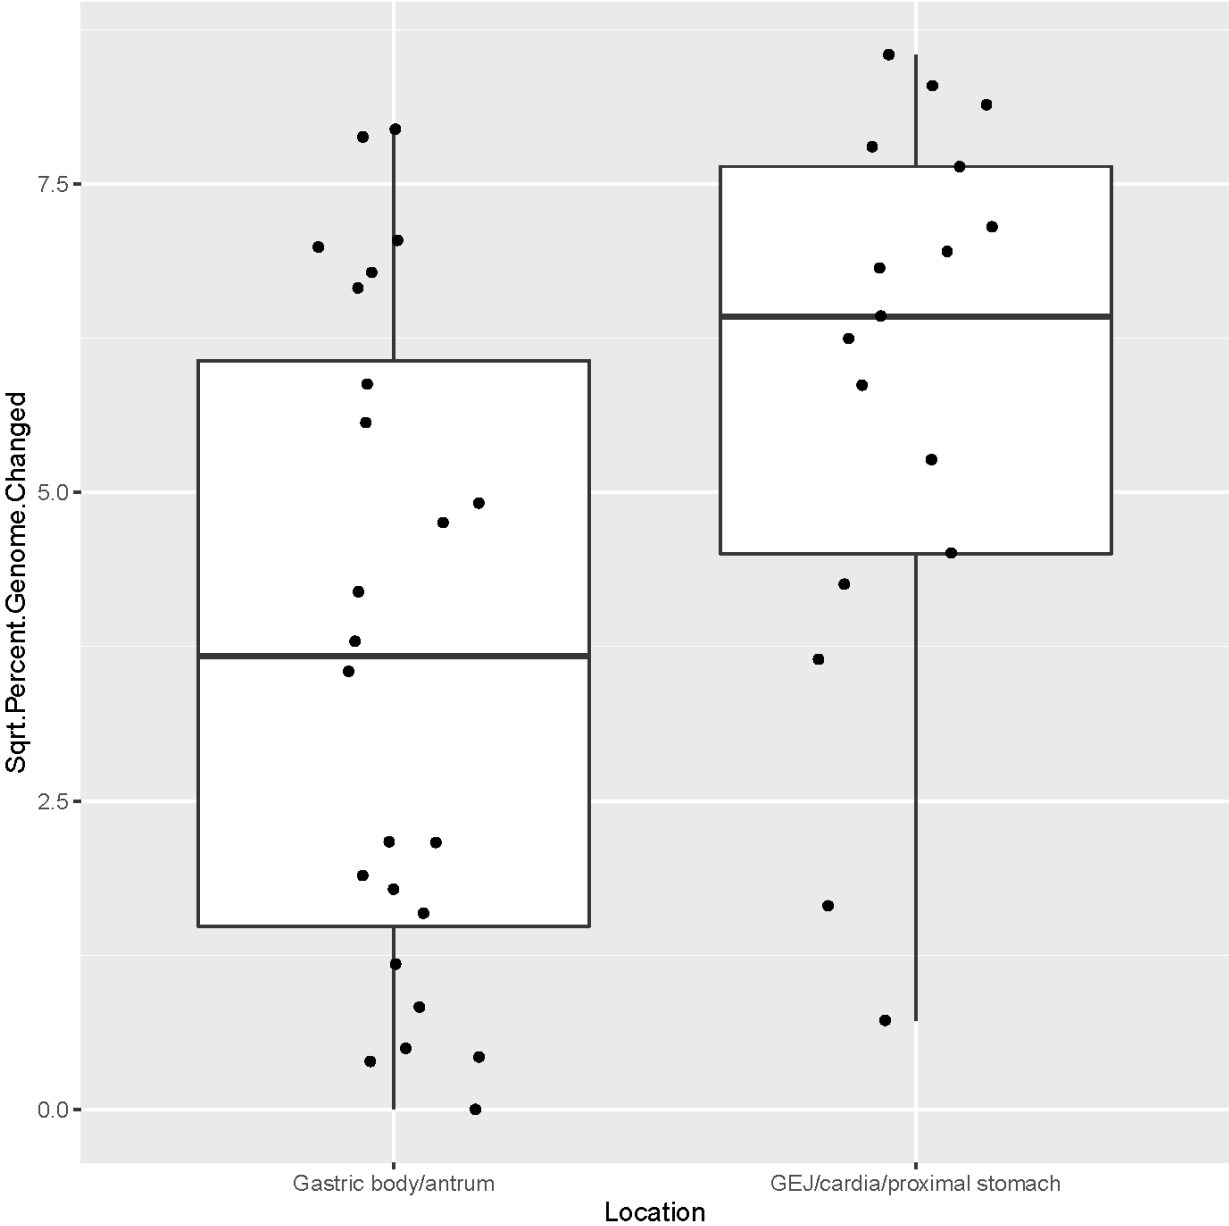

**eFigure 2.** A Case With Significant Alterations in Whole-Genome Copy Number and B-Allele Frequency Plot

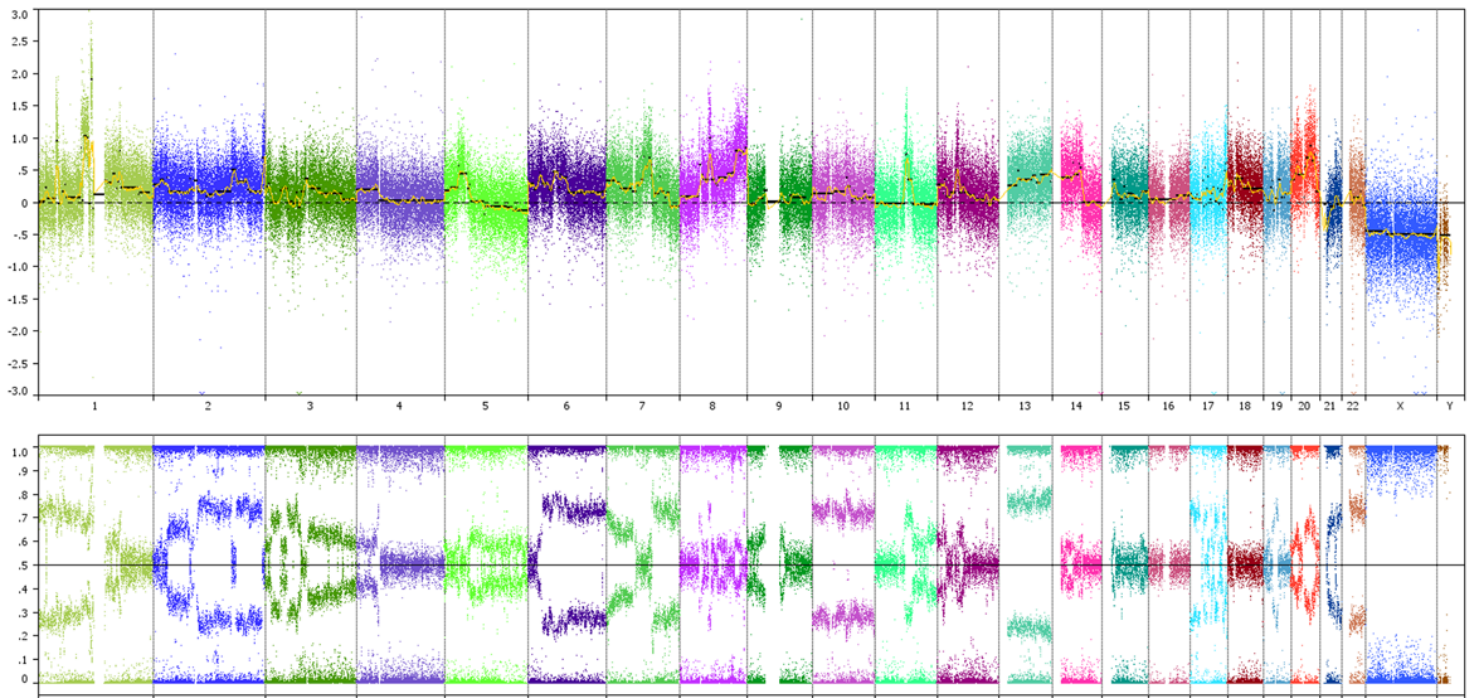

Top panel representing a case with significant alterations in whole genome copy number (y-axis, log2 scale) across multiple chromosomes (x-axis). The bottom panel represents the BAF (B allele frequency) plot (y-axis) in which multiple areas of the genome exhibit alternating retention and disruption of BAF representing both chromosomes (x-axis) with retention and loss of heterozygosity. This is indicative of chromothripsis being a major molecular event during this tumor's evolution.

**eFigure 3.** Oncoprint of CNAs and Mutations Detected With the OncoScan Platform Demonstrating Interpatient Tumoral Heterogeneity of Genomic Alterations of Selected Genes of Interest

A variety of oncogenic CNAs were observed across patients including high copy gains in *EGFR*, *JAK2*, *FGFR2*, *MET*, *VEGFA*, *KRAS*, *NRAS*, *PIK3CA*, *CCNE1*, *CCND1*, *CDK4*, *CDK6*, and *AURKA*. One sample exhibited co-amplification of *CD274* and *PDCD1LG2* (encoding PD-L1 and PD-L2), in addition to concurrent amplification of *ERBB2*, *JAK2*, *FGFR2*, *MET*, *KRAS*, *PIK3CA*, and *MDM2*.

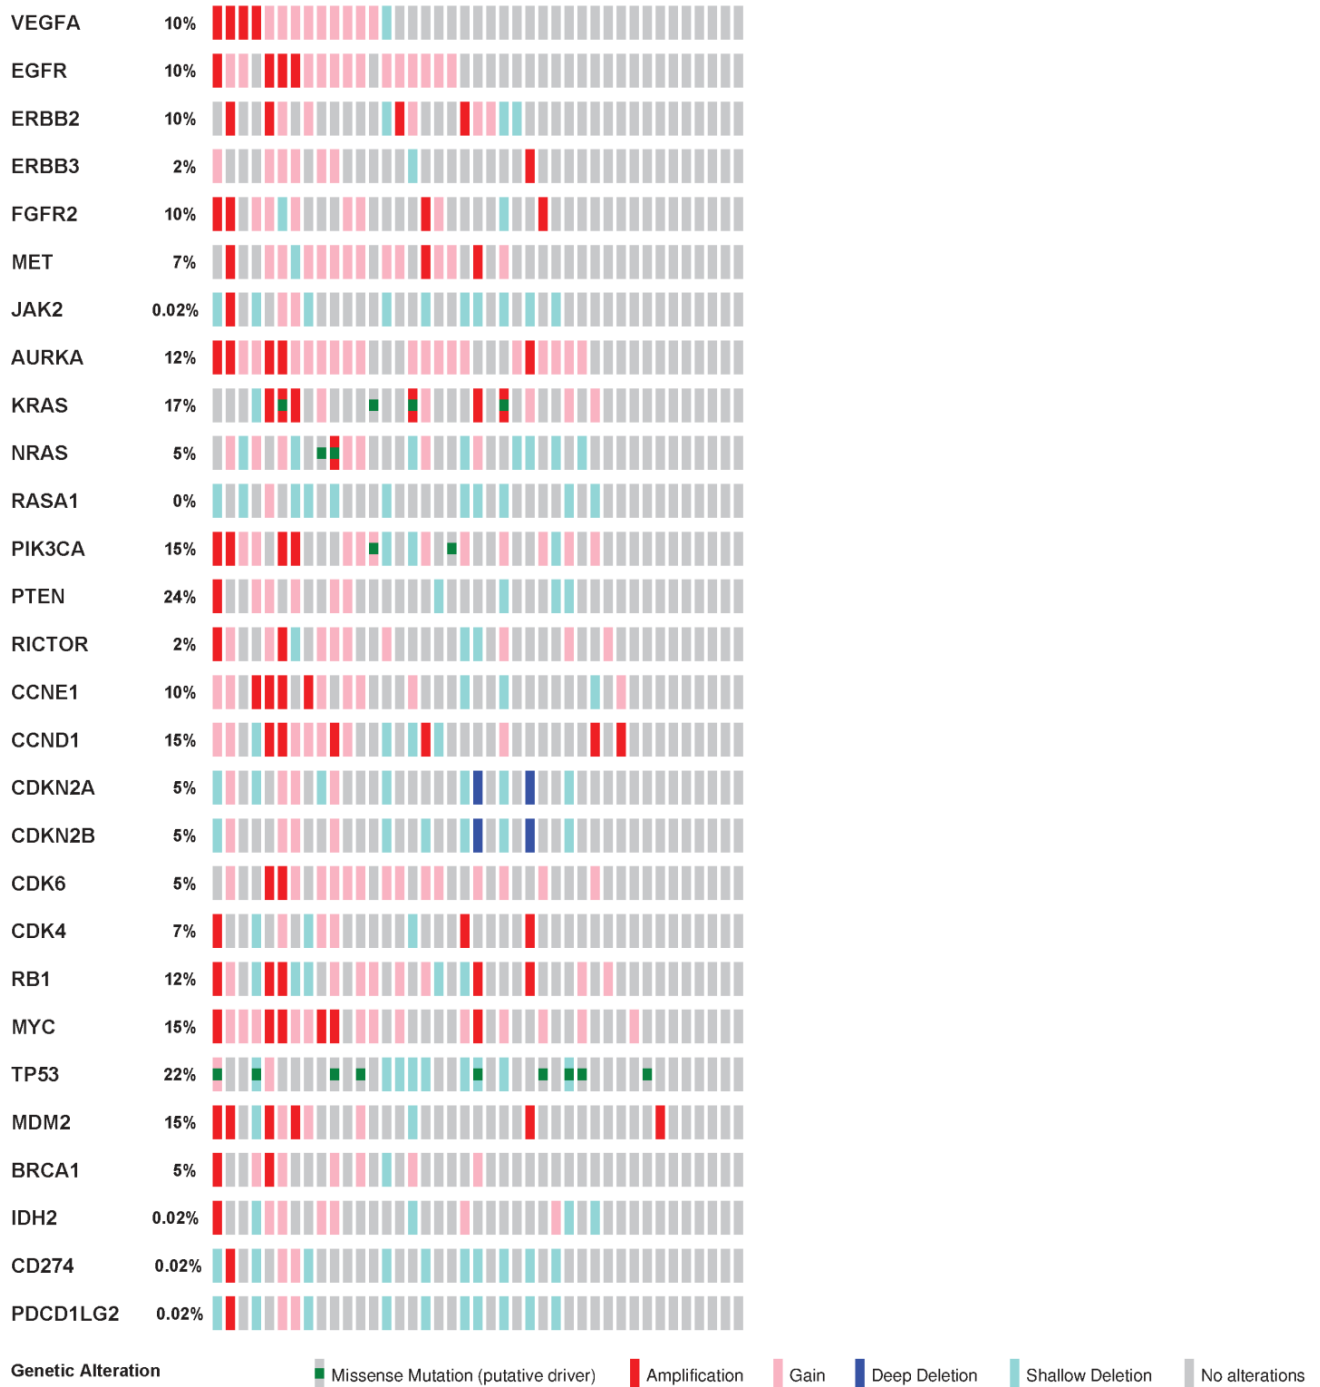

**eFigure 4. OncoScan Genomic Data**

**A. Oncoscan genomic data for Case 29.**

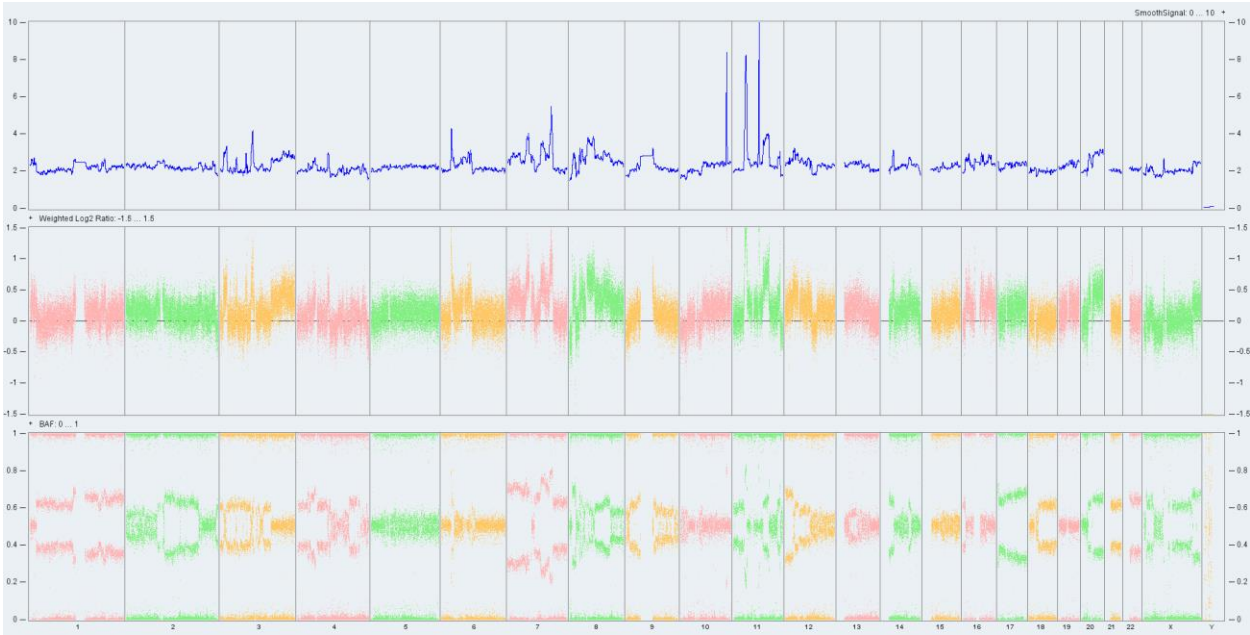

**B. Oncoscan genomic data for Case 37.**

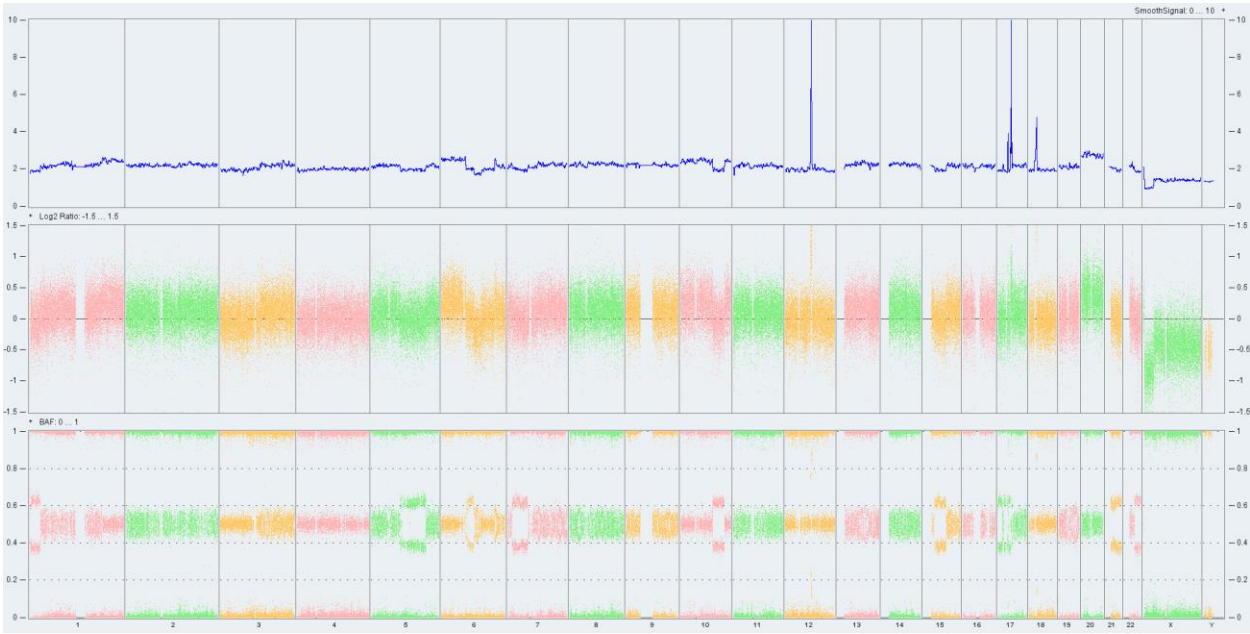

C. Oncoscan genomic data for Case 21.

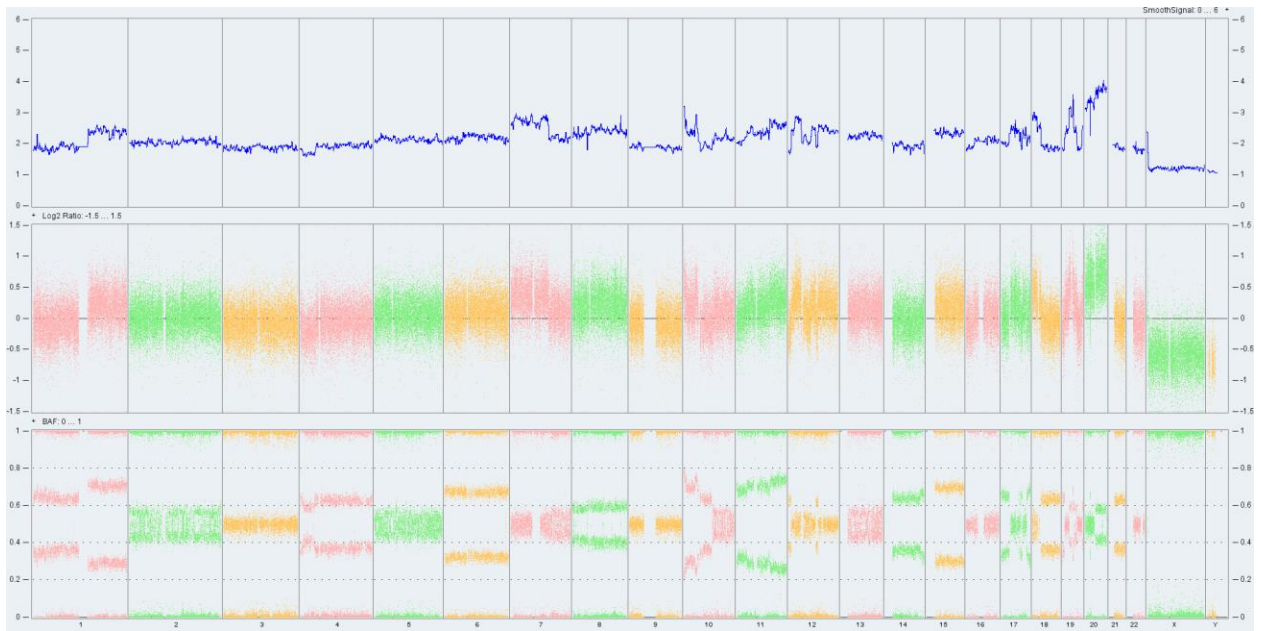

**eFigure 5.** Patient 29 Representing a pT3N0 Lauren Diffuse Subtype Adenocarcinoma Arising From the GEJ With CNAs in *MET*, *FGFR2*, *CCND1*, *EGFR*, *CD274*, and *PDCD1LG2*

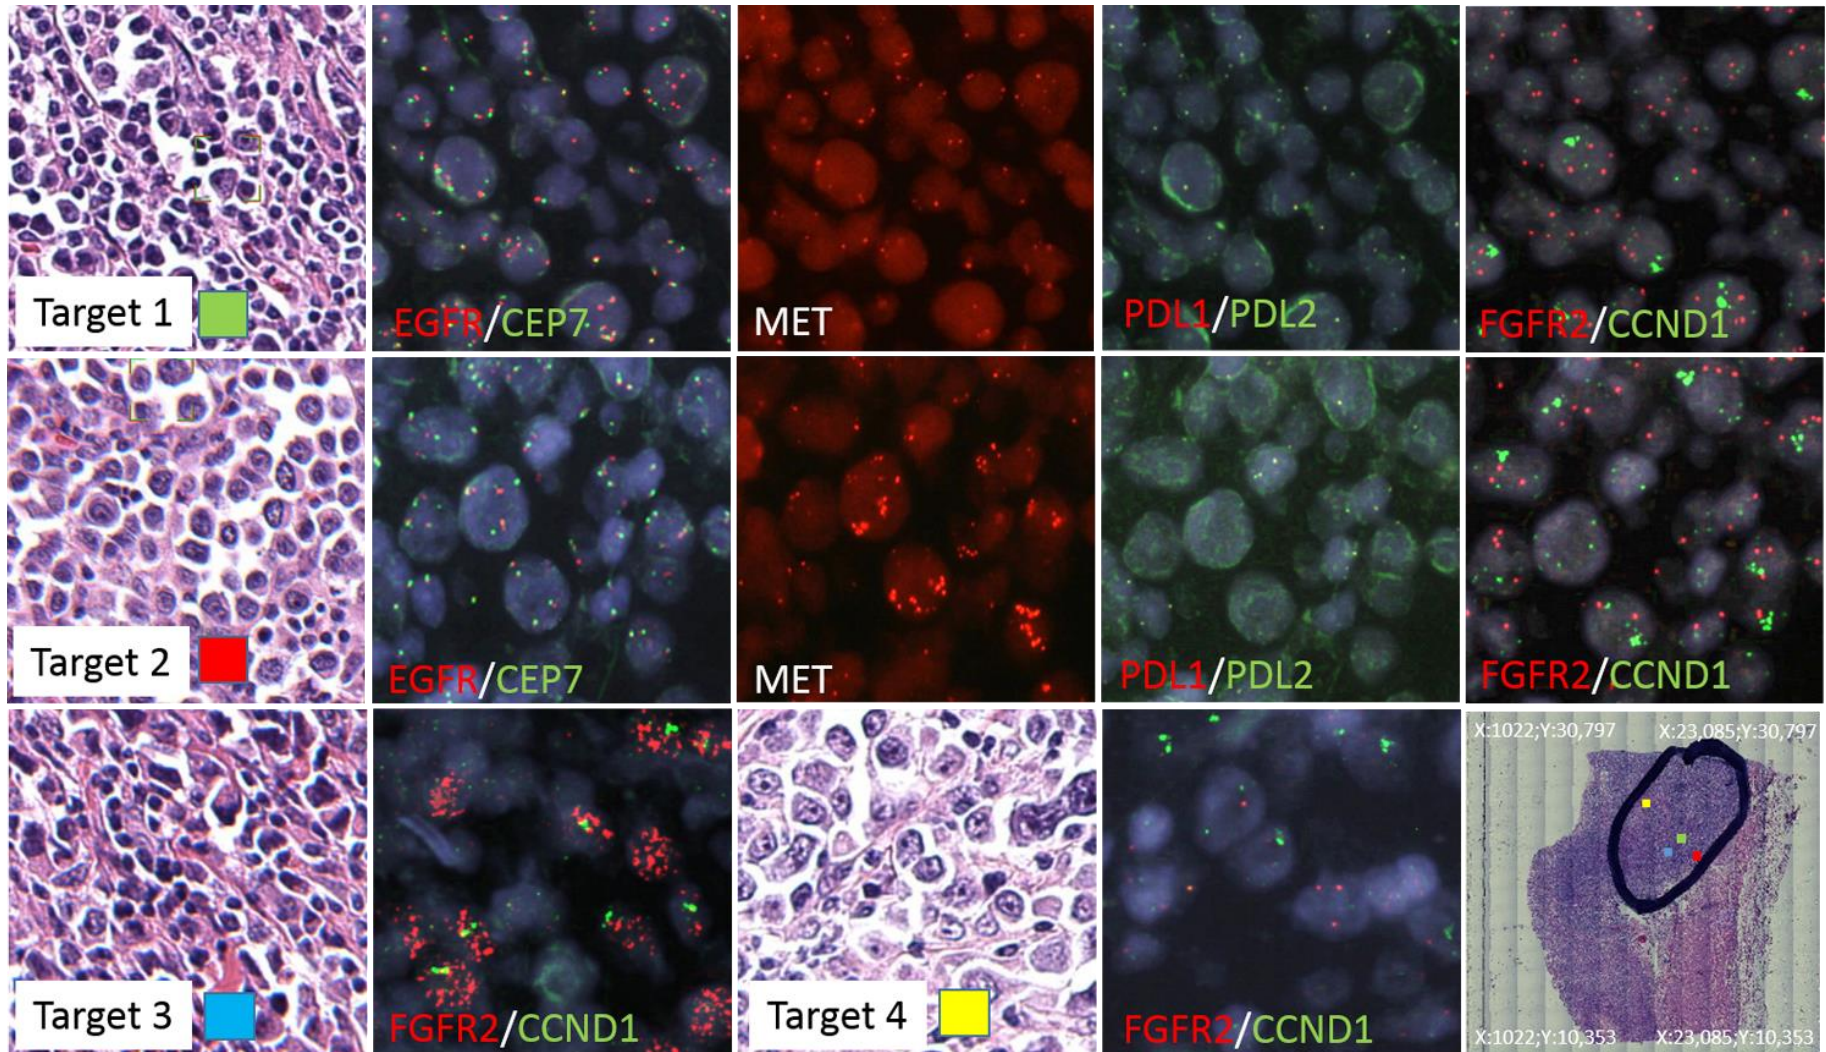

All fluorescent images are taken at 60X magnification, whole H&E tumor slide section image is at 5X, and zoomed in H&E is at 20X. The lower right panel is the tumor area of interest circled on the H&E slide section with the x,y reference coordinates at the four corners of the image displayed in micrometer distances. The top row encompasses images from Target 1 (green square) residing at coordinates  $x = 14,124 \mu\text{m}$ ;  $y = 23,706 \mu\text{m}$  and exhibited 4-7 copies of *EGFR*, 3 copies of *MET*, 1 copy of the genes encoding PD-L1/PD-L2, amplified *CCND1*, and 3-4 copies of *FGFR2*. The middle row represents Target 2 (red square) residing at coordinates  $x = 15,145 \mu\text{m}$ ;  $y = 23,424 \mu\text{m}$  and exhibited 3-4 copies *EGFR*, amplified *MET*, biallelic loss of the genes encoding PD-L1/PD-L2, amplified *CCND1* and



3-4 copies of *FGFR2*. Based on Oncoscan data reporting *FGFR2* amplification, additional targets were captured after initial analysis. An area of highly amplified *FGFR2* was subsequently identified in Target 3 (blue square, x = 13,505  $\mu\text{m}$ ; y = 23,449  $\mu\text{m}$ ). Target 4 (yellow square) resided the greatest distance from Target 1 at coordinates x = 11,002  $\mu\text{m}$ ; y = 27,428  $\mu\text{m}$  and exhibited normal copy number for *CCND1* and *FGFR2*.

**eFigure 6.** Patient 37 Representing a pT2N3a Lauren Intestinal Subtype Adenocarcinoma Arising From the Gastric Cardia

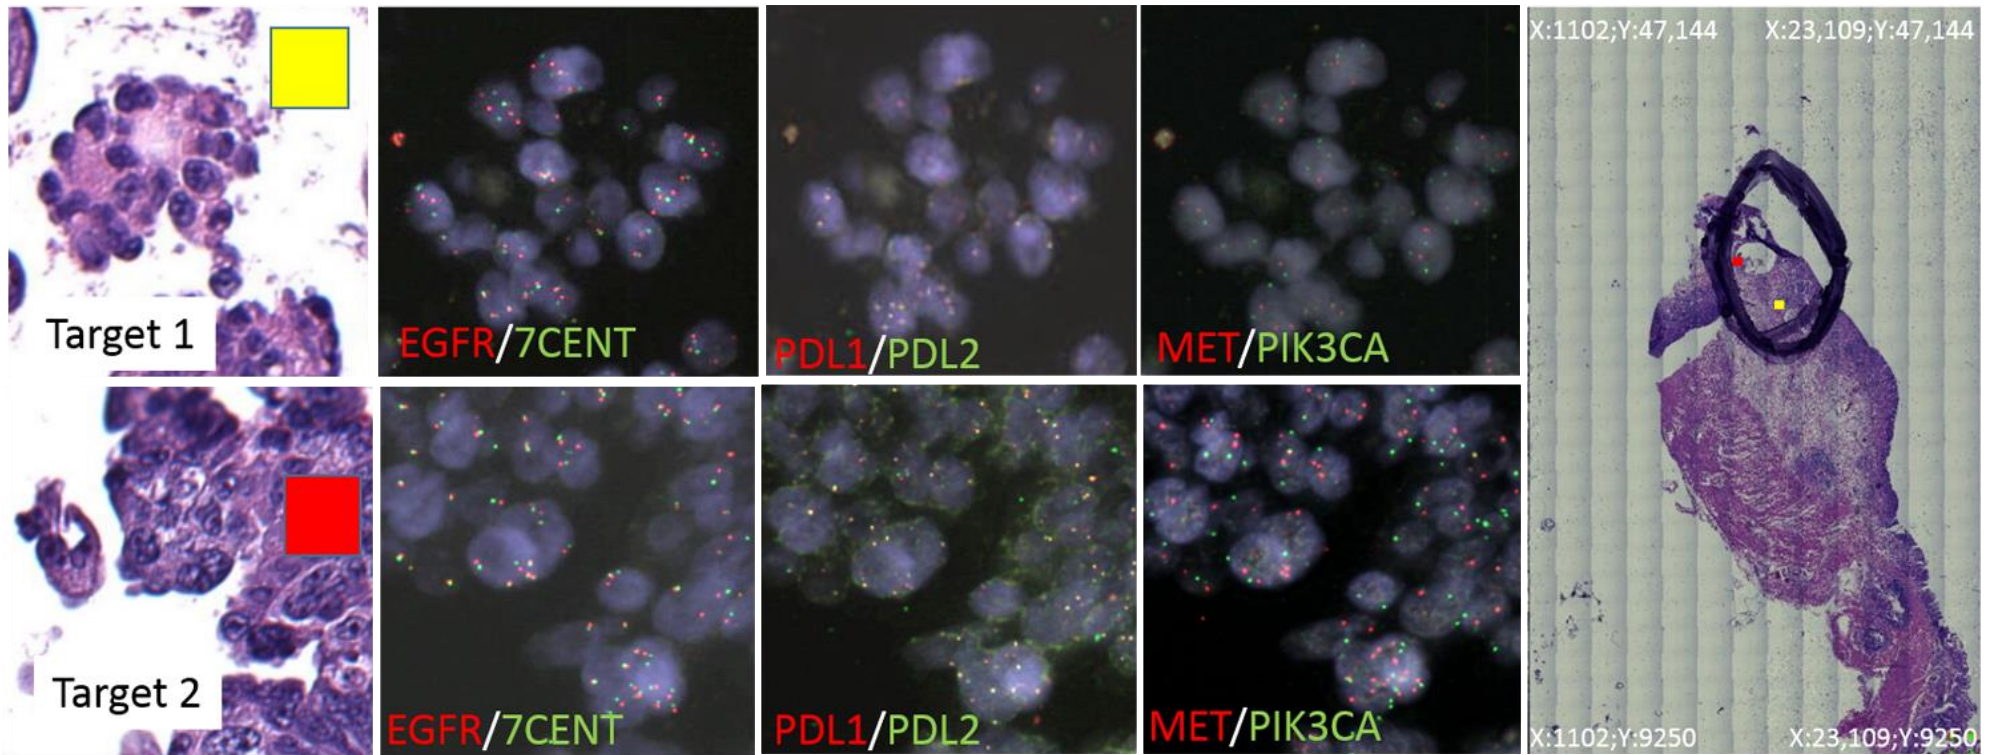

Oncoscan analysis revealed major CNAs of *CD274*, *PDCD1LG2*, *EGFR*, *MET*, and *PIK3CA*. Far right panel exhibits the tumor area of interest circled on the H&E slide section with the x,y reference coordinates at the four corners of the image displayed in micrometer distances. Top row encompasses Target 1 (yellow square) at coordinates  $x = 13,654 \mu\text{m}$ ;  $y = 33,594 \mu\text{m}$  exhibiting amplification of the genes encoding PD-L1 and PD-L2, but modest copy number gains of *EGFR*, *MET*, and *PIK3CA*. Bottom row represents Target 2 (red square) at coordinates  $x = 11,292 \mu\text{m}$ ;  $y = 34,466 \mu\text{m}$  exhibiting amplification in all 5 oncogenes. All fluorescent images are taken at 60X magnification, whole H&E tumor slide section image is at 5X, and zoomed in H&E is at 20X.

**eFigure 7.** Patient 21 Representing a pT3N0 Lauren Intestinal Subtype Adenocarcinoma Arising From the Gastric Antrum

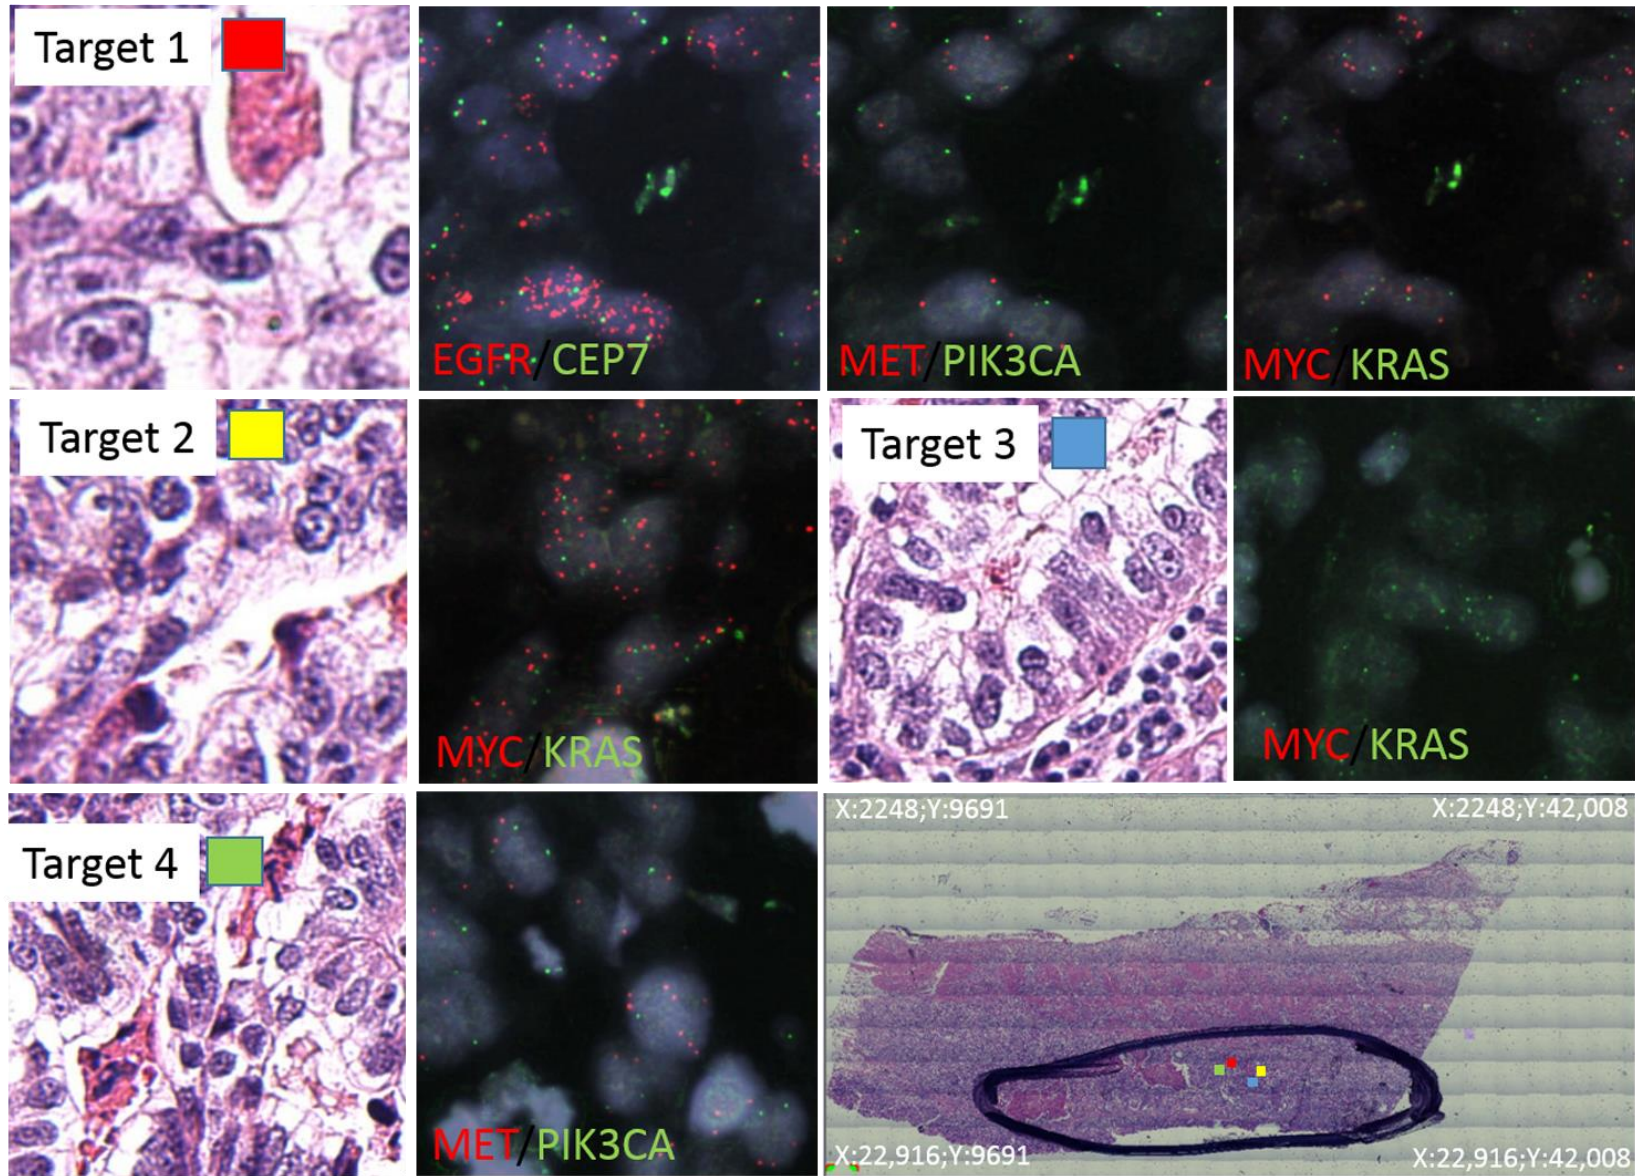

Oncoscan analysis reported amplification of *EGFR*, *MYC*, *KRAS*, *MET* and *PIK3CA*. Bottom right panel exhibits the tumor area of interest circled on the H&E slide section with the x,y reference coordinates at the four corners of the image displayed in micrometer distances. Top row encompasses Target 1 (red square) at coordinates x = 16,854  $\mu\text{m}$ ; y = 24,633  $\mu\text{m}$  and exhibited amplified *EGFR* with normal copy numbers of *MET*, *MYC*, and *PIK3CA* and modest copy number gain in *KRAS*. Target 2 (yellow square) resided at coordinates x = 17,387  $\mu\text{m}$ ; y = 25,310  $\mu\text{m}$  and demonstrated amplified *MYC* with normal *KRAS* copy number. Target 3 (blue square) at coordinates x = 17,682  $\mu\text{m}$ ; y = 25,188  $\mu\text{m}$  exhibited the converse of Target 2 with amplified *KRAS* but normal *MYC* copy number. Target 4 (green square) at coordinates x = 17,407  $\mu\text{m}$ ; y = 24,485  $\mu\text{m}$  demonstrated amplified *MET* with normal copy number for *PIK3CA*. All fluorescent images are taken at 60X magnification, whole H&E tumor slide section image is at 5X, and zoomed in H&E is at 20X.
